# Supplementary material for: Chemokine Receptor Ccr6 Deficiency Alters Hepatic Inflammatory Cell Recruitment and Promotes Liver Inflammation and Fibrosis
Source: PLoS One. 2015 Dec 21;10(12):e0145147. doi: 10.1371/journal.pone.0145147 (PMC4687007; doi:10.1371/journal.pone.0145147)

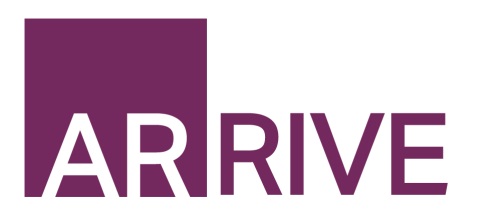


The ARRIVE Guidelines Checklist

Animal Research: Reporting In Vivo Experiments

Carol Kilkenny1, William J Browne2, Innes C Cuthill3, Michael Emerson4 and Douglas G Altman5

*1The National Centre for the Replacement, Refinement and Reduction of Animals in Research, London, UK, 2School of Veterinary Science, University of Bristol, Bristol, UK, 3School of Biological Sciences, University of Bristol, Bristol, UK, 4National Heart and Lung Institute, Imperial College London, UK, 5Centre for Statistics in Medicine, University of Oxford, Oxford, UK.*

|  | | ITEM | RECOMMENDATION | Section/ Paragraph |
| --- | --- | --- | --- | --- |
| 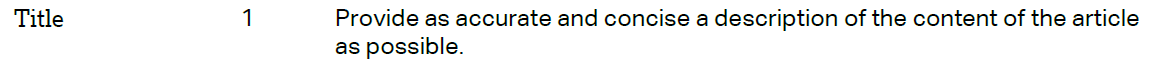 | | | Page 1 |
| 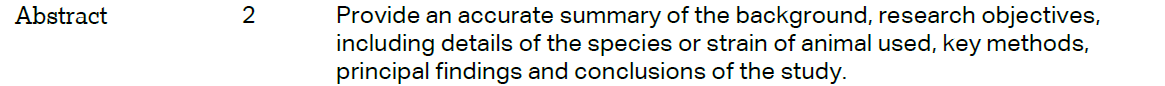 | | | Page 3 |
| INTRODUCTION | | |  |
| 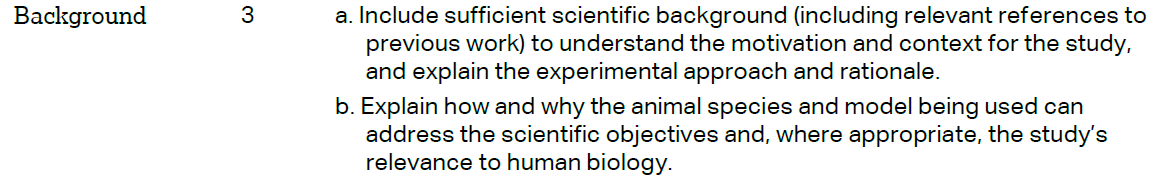 | | | Pages 4-5 |
| 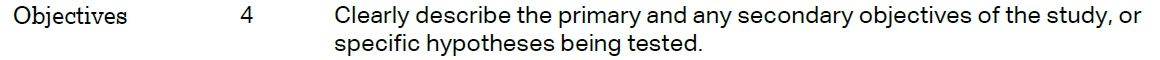 | | | Page 5, paragraph 3 |
| METHODS | | |  |
| 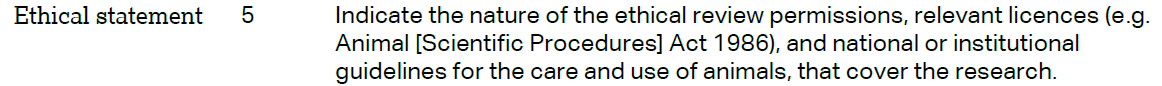 | | | Page 6, paragraph 2 |
| 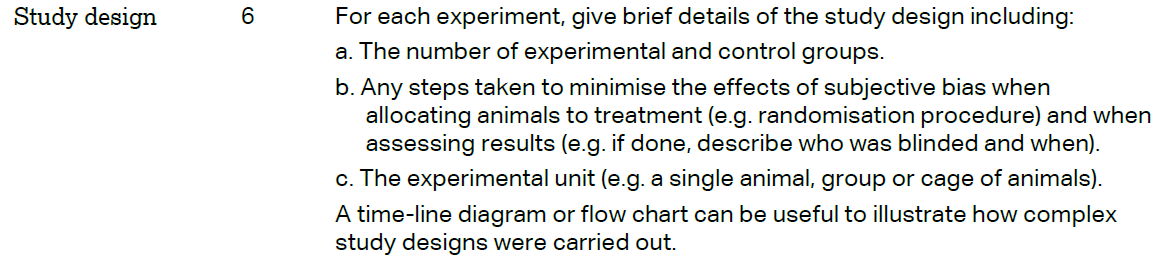 | | | Page 6, paragraph 3, Figure Legends (pages 22-24) and Supplementary Materials (Pages 1-2) |
| 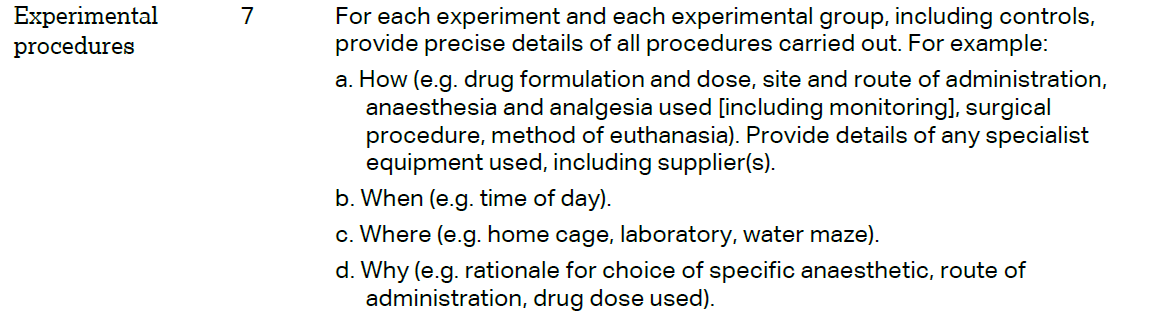 | | | Page 6, paragraph 3 and Supplementary Materials (Pages 1-2) |
| 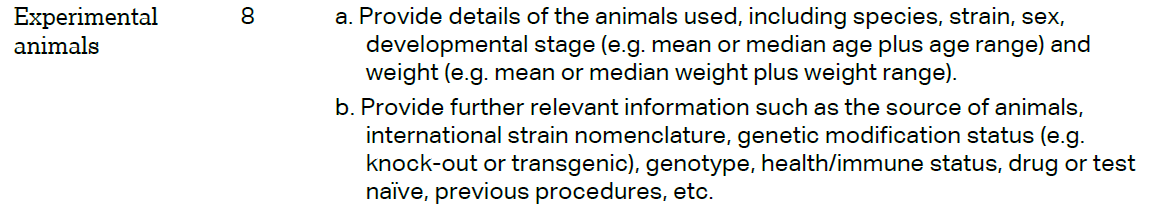 | | | Page 6, paragraph 3 and Supplementary Materials (Pages 1-2) |

The ARRIVE guidelines. Originally published in *PLoS Biology*, June 20101

| 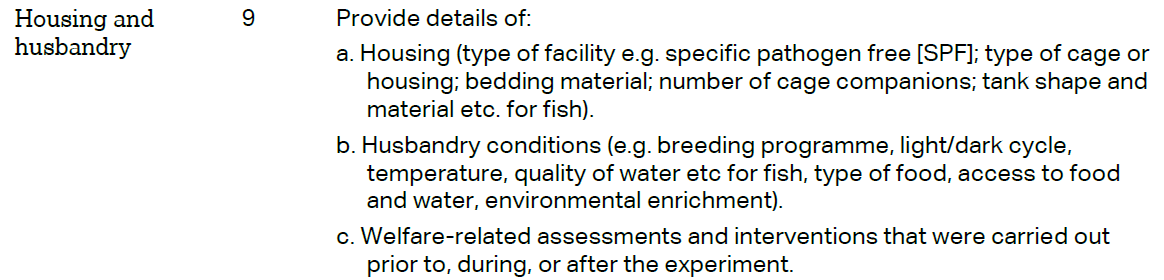 | Page 6, paragraph 3, and Supplementary Material (Pages 1-2) | |
| --- | --- | --- |
| 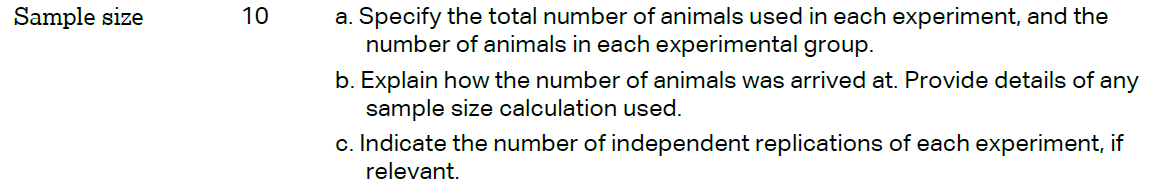 | Figure Legends 1-4 (Pages 22-23) | |
| 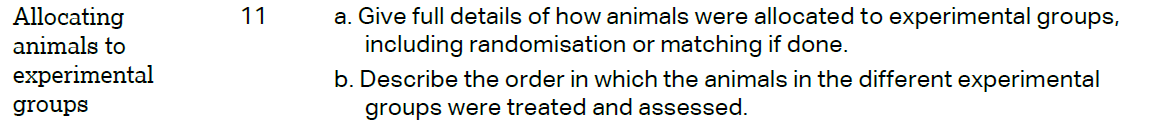 | Figure Legends 1-4 (Pages 22-23) | |
| 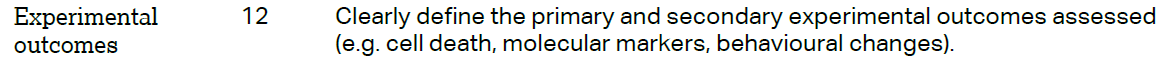 | Figure Legends 1-4 (Pages 22-23) and Supplementary Material (Pages 1-2) | |
| 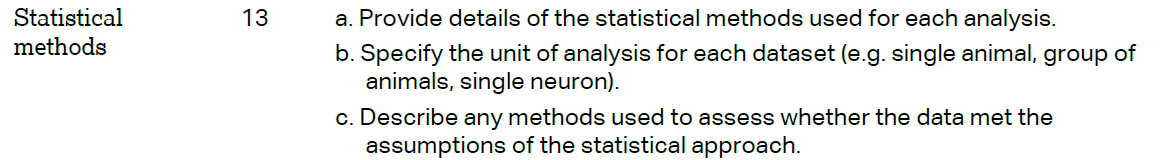 | Page 7 | |
| RESULTS |  | |
| 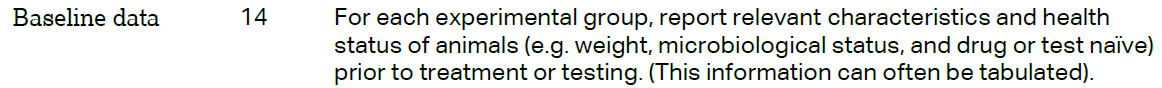 | Pages 8-11 | |
| 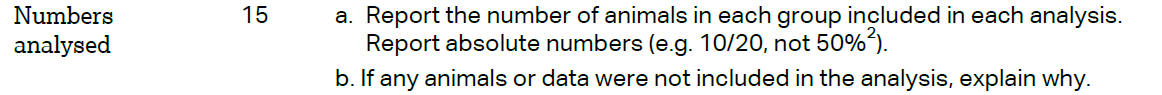 | Pages 8-11 and Figure Legends 1-4 (Pages 22-23) | |
| 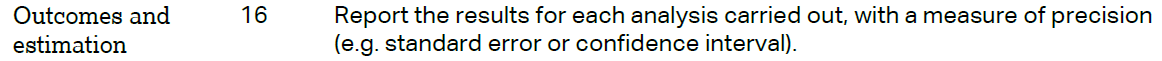 | Pages 8-11 | |
| 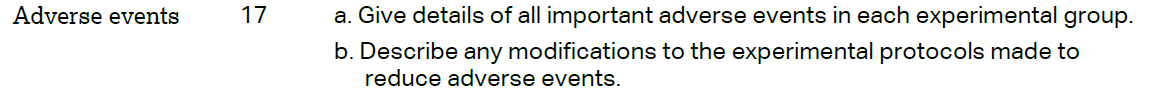 | Pages 8-11 | |
| DISCUSSION |  | |
| 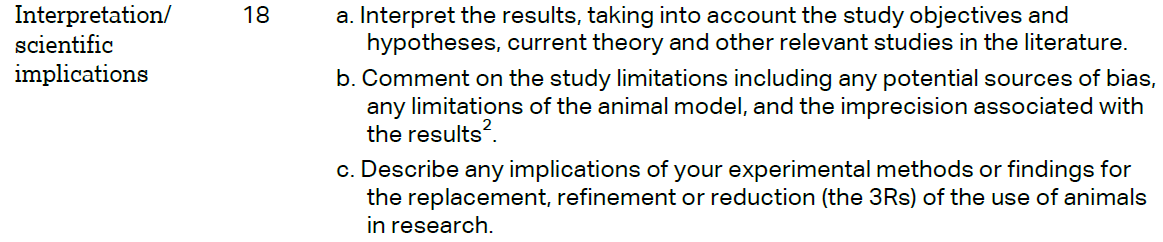 | Pages 13-16 | |
| 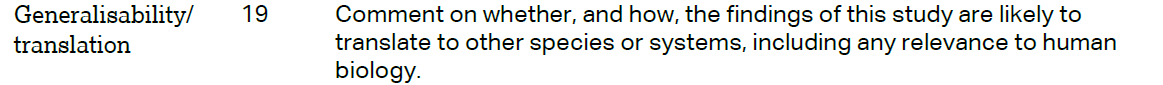 | Pages 13-16 | |
| 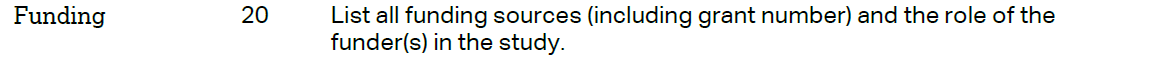 | | Online Submission |


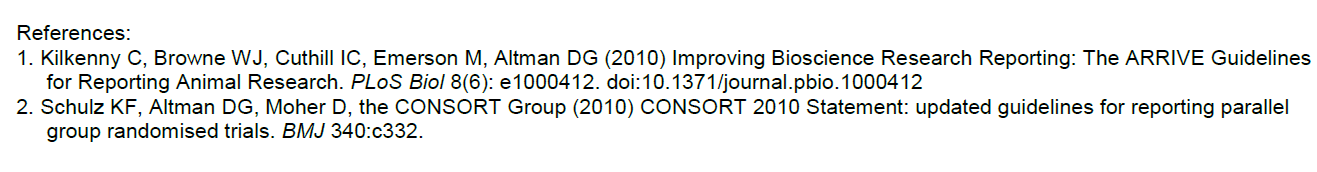

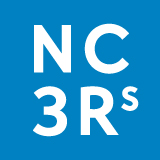

Supplement: S1 Checklist — (DOCX) [file pone.0145147.s001.docx]
